# Supplementary material
Source: PubMed Central journal article supplement (PMC2606041)
Supplement: NIHMS80637-supplement-01.pdf [file NIHMS80637-supplement-01.pdf]

## Supplemental Data

## Insights into the Nature of DNA Binding

## of AbrB-like Transcription Factors

Daniel M. Sullivan, Benjamin G. Bobay, Douglas J. Kojetin, Richele J. Thompson, Mark Rance, Mark A. Strauch, and John Cavanagh

```

AbrBN_BACSU      MKSTGIVRKVDELGRVVIPIELRRTLGLIAEKDALEIYVDDE-KIILKKYKPNMT-
AbhN_BACSU       MKSIGVVRKVDELGRIVMPIELRRALDIAIKDSIEFFVDGD-KIILKKYKPHGVC
SpoVTN_BACSU     MKATGIVRRIDDLGRVVIPKEIRRTLRIREGDPLEIFVDRDGEVILKKYSPISEL
** : *::*::*::*::*::*::* *::*::* *  *::*::*::* : ::*::*::*

```

### Figure S1. Multiple Sequence Alignment of AbrBN, AbhN, and SpoVTN

N-terminal sequence alignment of AbrB, Abh, and SpoVT from *B. subtilis*. Identical residues are marked by an *asterisk*, strongly similar residues are marked by a *colon*, somewhat similar residues are marked by a *dot*, and dissimilar residues are not marked.

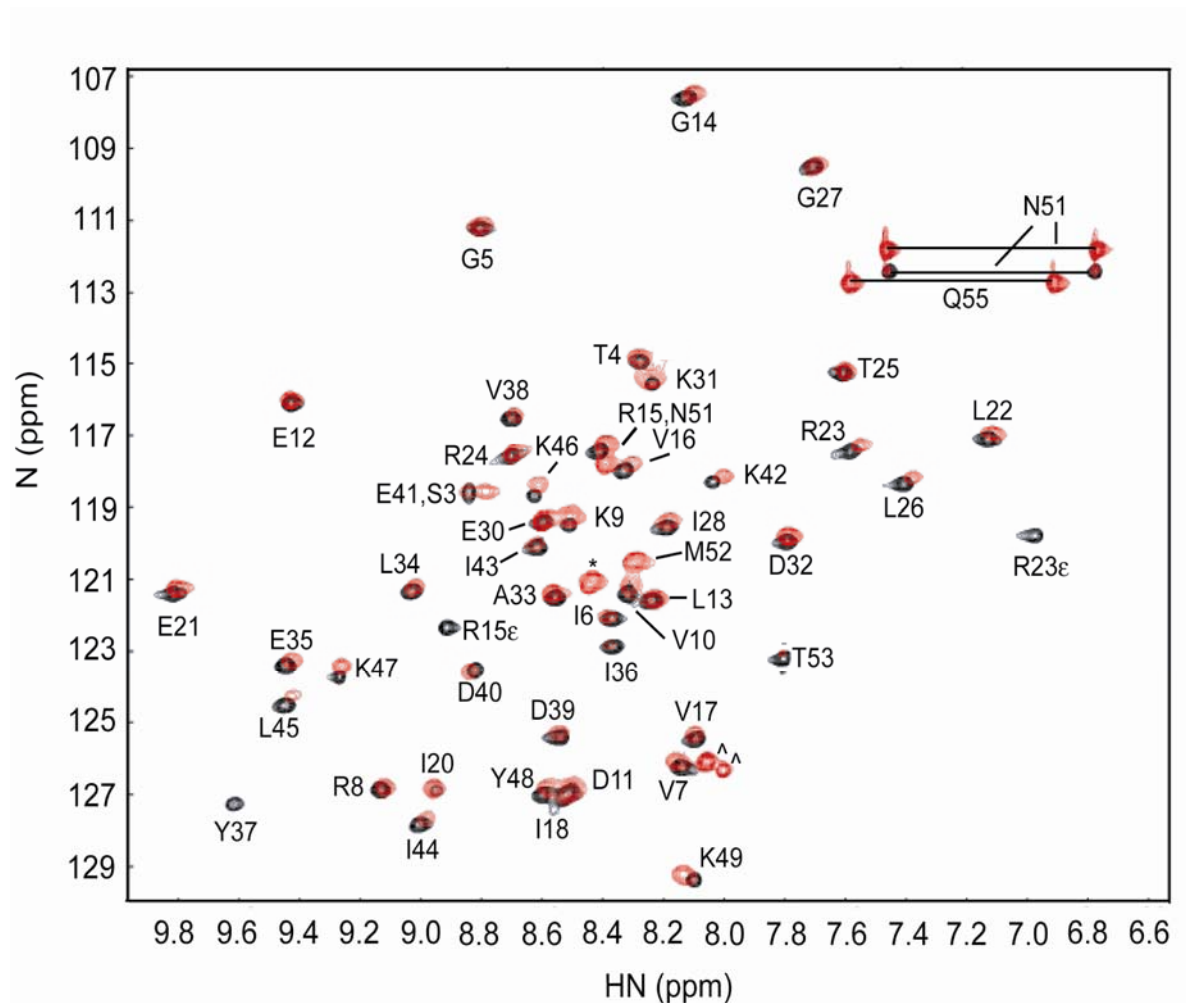

### Figure S2. $^{15}\text{N}$ HSQC Spectra Overlay of AbrBN and AbrBN<sup>55</sup>-Tetramer

AbrBN spectra denoted with black peaks while AbrBN<sup>55</sup>-tetramer spectra denoted with red peaks. Spectrum is labeled with AbrBN assignments. Q55 is only present in AbrBN<sup>55</sup>-tetramer as

it is the 55th residue. The ^ symbol denotes extra peaks in the AbrBN<sup>55</sup> spectra that can be attributed to residues C54 and Q55 while, the \* symbol denotes a possible NH side chain. Results suggest that no major structural change takes place when AbrBN<sup>55</sup>-tetramer is oxidized, suggesting a modeling strategy using oxidized AbrBN<sup>55</sup>-tetramer as the binder is warranted.

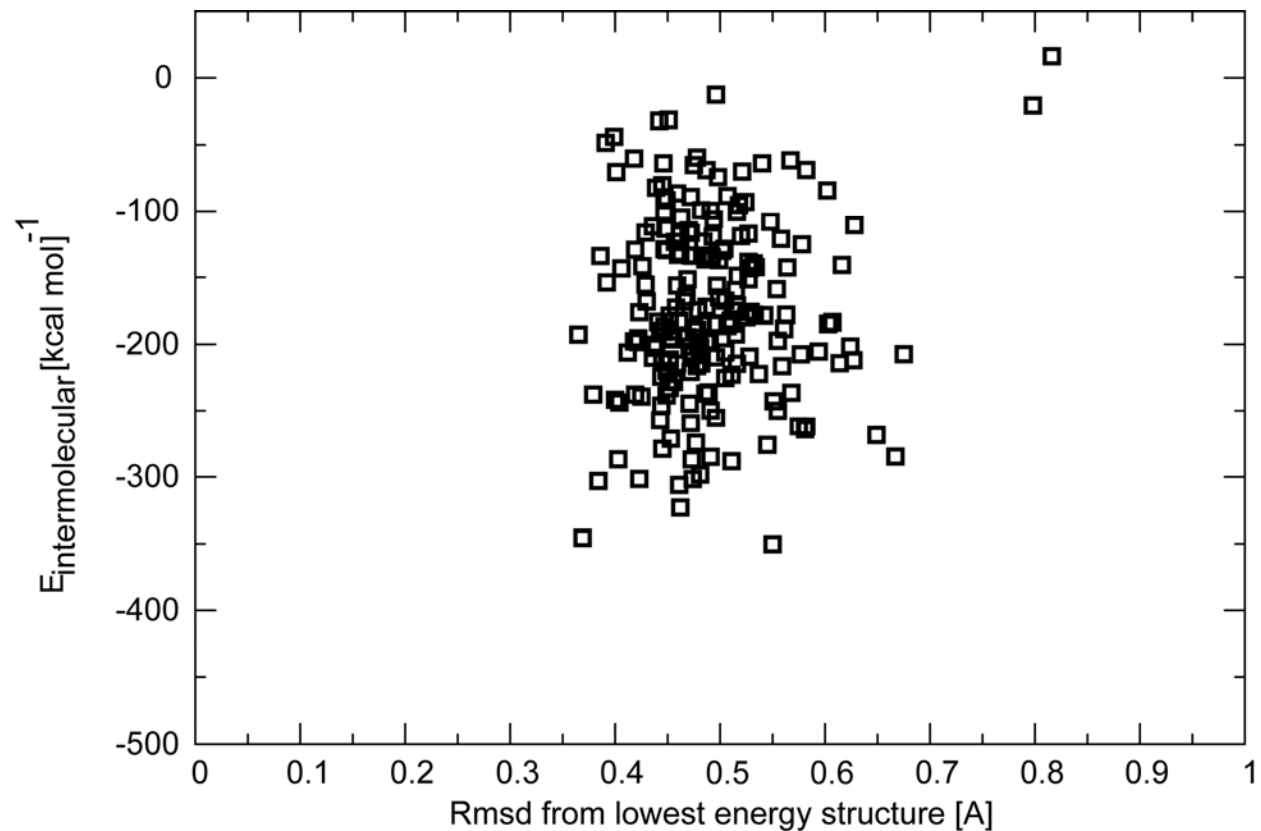

**Figure S3. HADDOCK Score Versus RMSD for the AbrBN<sup>55</sup>-Tetramer in Complex with *abrB8* (Semi-Flexible Docking Protocol)**

The results show one cluster of structures with an r.m.s.d. range of 1.5 to 3.0Å for two hundred water refined complexes from the semi-flexible HADDOCK docking protocol. The  $E_{\text{inter}}$  is similar to published HADDOCK protein-DNA docking (van Dijk *et al.*, 2006). The solution in the semi-flexible docking appears to be very similar with respect to the protein and the spatial arrangement of the complex.

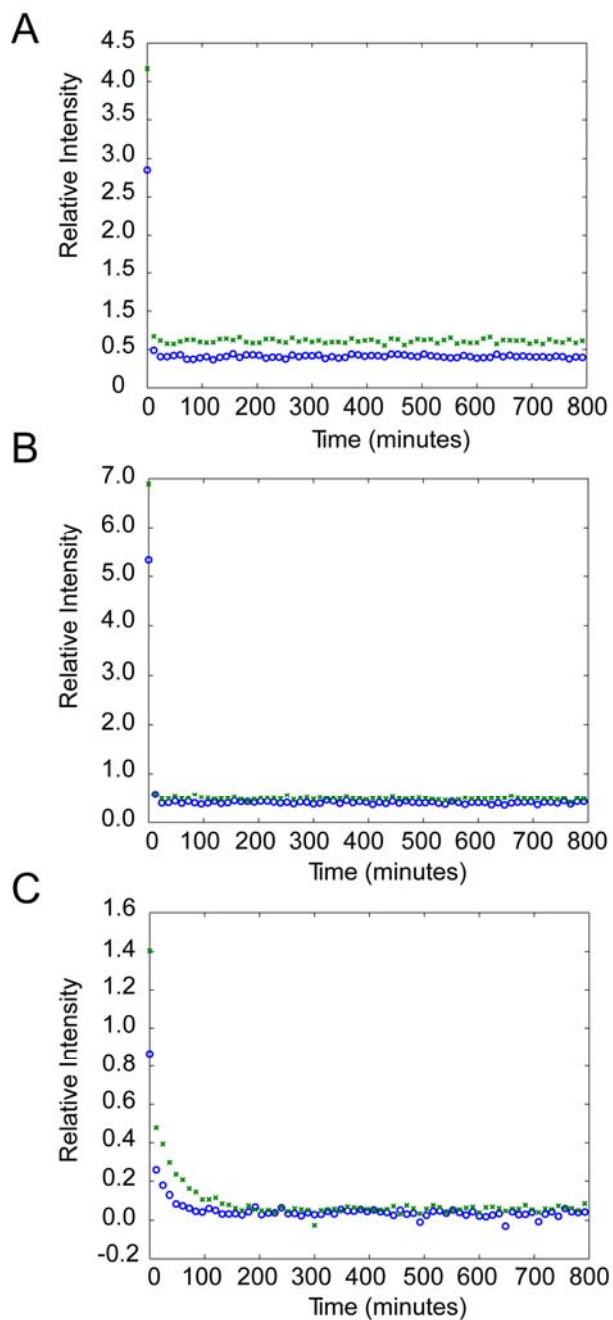

**Figure S4. Hydrogen Exchange Data for the “GD-Box” Region of AbrBN, AbhN and SpoVTN**

Sixty-six sequential twelve minute  $^1\text{H}$ - $^{15}\text{N}$  HSQC were recorded to determine exchange protected amide protons.

(A) AbrBN

(B) AbhN

(C) SpoVTN.

“o” is residue 10 and “x” is residue 32.

Supplementary Table 1. AbhN <sup>15</sup>N relaxation and dynamics parameters (pH 5.8, 305.15 K, 399.8636182 MHz)

| Residue          | $R_1$<br>( $s^{-1}$ ) | $R_2$<br>( $s^{-1}$ ) | NOE         | Model | $S^2$         | $S_f^2$       | $\tau_e < 100$ or $\tau_f$<br>(ps) | $\tau_e > 100$ or $\tau_s$<br>(ps) | $R_{ex}$<br>( $s^{-1}$ ) |
|------------------|-----------------------|-----------------------|-------------|-------|---------------|---------------|------------------------------------|------------------------------------|--------------------------|
| <i>Monomer A</i> |                       |                       |             |       |               |               |                                    |                                    |                          |
| M1               |                       |                       |             |       |               |               |                                    |                                    |                          |
| K2               |                       |                       |             |       |               |               |                                    |                                    |                          |
| S3               | 2.15 ± 0.04           | 5.66 ± 0.10           | 0.22 ± 0.01 | m2    | 0.574 ± 0.007 |               |                                    | 120 ± 5                            |                          |
| I4               | 2.35 ± 0.05           | 7.87 ± 0.15           | 0.32 ± 0.02 | m4    | 0.646 ± 0.013 |               |                                    | 126 ± 11                           | 1.57 ± 0.20              |
| G5               | 2.54 ± 0.08           | 10.93 ± 0.30          | 0.43 ± 0.04 | m4    | 0.718 ± 0.024 |               |                                    | 129 ± 23                           | 3.99 ± 0.37              |
| V6               |                       |                       |             |       |               |               |                                    |                                    |                          |
| V7               | 2.71 ± 0.05           | 7.07 ± 0.13           | 0.68 ± 0.02 | m5    | 0.689 ± 0.038 | 0.820 ± 0.015 |                                    | 3497 ± 1593                        |                          |
| R8               | 2.86 ± 0.04           | 7.42 ± 0.11           | 0.67 ± 0.02 | m5    | 0.719 ± 0.031 | 0.869 ± 0.011 |                                    | 3311 ± 963                         |                          |
| K9               | 2.64 ± 0.06           | 8.82 ± 0.19           | 0.64 ± 0.03 | m4    | 0.785 ± 0.017 |               | 55 ± 15                            |                                    | 1.37 ± 0.22              |
| V10              | 2.68 ± 0.04           | 8.12 ± 0.10           | 0.67 ± 0.02 | m4    | 0.801 ± 0.011 |               | 44 ± 9                             |                                    | 0.54 ± 0.16              |
| D11              | 2.74 ± 0.05           | 10.99 ± 0.18          | 0.71 ± 0.02 | m4    | 0.827 ± 0.014 |               | 26 ± 14                            |                                    | 3.20 ± 0.23              |
| E12              | 2.70 ± 0.03           | 8.40 ± 0.09           | 0.63 ± 0.01 | m4    | 0.800 ± 0.009 |               | 67 ± 8                             |                                    | 0.81 ± 0.12              |
| L13              | 2.82 ± 0.04           | 8.63 ± 0.11           | 0.67 ± 0.02 | m4    | 0.843 ± 0.011 |               | 59 ± 12                            |                                    | 0.66 ± 0.16              |
| G14              | 2.76 ± 0.04           | 8.40 ± 0.11           | 0.71 ± 0.02 | m4    | 0.831 ± 0.012 |               | 27 ± 11                            |                                    | 0.55 ± 0.15              |
| R15              |                       |                       |             |       |               |               |                                    |                                    |                          |
| I16              | 2.71 ± 0.04           | 9.01 ± 0.13           | 0.69 ± 0.02 | m4    | 0.814 ± 0.013 |               | 35 ± 13                            |                                    | 1.32 ± 0.17              |
| V17              | 2.62 ± 0.04           | 8.03 ± 0.10           | 0.68 ± 0.02 | m4    | 0.786 ± 0.012 |               | 34 ± 8                             |                                    | 0.60 ± 0.13              |
| M18              | 2.70 ± 0.04           | 7.75 ± 0.10           | 0.67 ± 0.02 | m2    | 0.814 ± 0.008 |               | 44 ± 9                             |                                    |                          |
| P19              |                       |                       |             |       |               |               |                                    |                                    |                          |
| I20              | 2.76 ± 0.05           | 8.07 ± 0.12           | 0.64 ± 0.02 | m4    | 0.820 ± 0.015 |               | 70 ± 12                            |                                    | 0.29 ± 0.18              |
| E21              | 2.70 ± 0.03           | 7.99 ± 0.09           | 0.70 ± 0.01 | m4    | 0.812 ± 0.009 |               | 28 ± 7                             |                                    | 0.33 ± 0.12              |
| L22              | 2.81 ± 0.04           | 7.54 ± 0.10           | 0.64 ± 0.02 | m5    | 0.763 ± 0.021 | 0.871 ± 0.013 |                                    | 1921 ± 554                         |                          |
| R23              | 2.70 ± 0.03           | 7.51 ± 0.10           | 0.65 ± 0.01 | m2    | 0.798 ± 0.007 |               | 55 ± 9                             |                                    |                          |
| R24              | 2.71 ± 0.03           | 7.70 ± 0.09           | 0.66 ± 0.01 | m2    | 0.810 ± 0.006 |               | 53 ± 7                             |                                    |                          |
| A25              | 2.70 ± 0.03           | 7.75 ± 0.08           | 0.70 ± 0.01 | m2    | 0.817 ± 0.005 |               | 26 ± 7                             |                                    |                          |
| L26              | 2.74 ± 0.04           | 7.82 ± 0.10           | 0.68 ± 0.02 | m2    | 0.825 ± 0.008 |               | 40 ± 12                            |                                    |                          |
| D27              |                       |                       |             |       |               |               |                                    |                                    |                          |
| I28              | 2.68 ± 0.04           | 8.30 ± 0.11           | 0.71 ± 0.02 | m4    | 0.809 ± 0.013 |               | 21 ± 10                            |                                    | 0.67 ± 0.16              |
| A29              | 2.64 ± 0.04           | 8.14 ± 0.11           | 0.66 ± 0.02 | m4    | 0.788 ± 0.012 |               | 46 ± 10                            |                                    | 0.68 ± 0.15              |
| I30              | 2.71 ± 0.03           | 7.22 ± 0.08           | 0.66 ± 0.01 | m5    | 0.725 ± 0.020 | 0.833 ± 0.008 |                                    | 2396 ± 563                         |                          |
| K31              | 2.77 ± 0.05           | 8.79 ± 0.15           | 0.68 ± 0.03 | m4    | 0.830 ± 0.017 |               | 48 ± 19                            |                                    | 0.93 ± 0.22              |
| D32              | 2.74 ± 0.03           | 7.87 ± 0.09           | 0.69 ± 0.01 | m2    | 0.828 ± 0.007 |               | 38 ± 8                             |                                    |                          |
| S33              | 2.53 ± 0.03           | 6.73 ± 0.09           | 0.66 ± 0.02 | m5    | 0.673 ± 0.023 | 0.777 ± 0.010 |                                    | 2587 ± 766                         |                          |
| I34              | 2.87 ± 0.07           | 9.47 ± 0.19           | 0.66 ± 0.03 | m4    | 0.855 ± 0.021 |               | 69 ± 28                            |                                    | 1.37 ± 0.29              |
| E35              | 2.93 ± 0.04           | 8.12 ± 0.11           | 0.69 ± 0.02 | m2    | 0.869 ± 0.009 |               | 57 ± 18                            |                                    |                          |
| F36              | 2.82 ± 0.05           | 7.80 ± 0.13           | 0.69 ± 0.02 | m2    | 0.834 ± 0.011 |               | 43 ± 16                            |                                    |                          |
| F37              | 2.79 ± 0.04           | 7.38 ± 0.11           | 0.68 ± 0.02 | m5    | 0.732 ± 0.029 | 0.849 ± 0.015 |                                    | 3043 ± 1162                        |                          |
| V38              | 2.59 ± 0.04           | 9.34 ± 0.11           | 0.67 ± 0.02 | m4    | 0.775 ± 0.011 |               | 37 ± 9                             |                                    | 2.00 ± 0.15              |
| D39              | 2.73 ± 0.04           | 7.66 ± 0.10           | 0.68 ± 0.02 | m2    | 0.815 ± 0.008 |               | 38 ± 10                            |                                    |                          |

Supplementary Table 1 continued

Supplementary Table 1. AbhN <sup>15</sup>N relaxation and dynamics parameters (pH 5.8, 305.15 K, 399.8636182 MHz)

| Residue | $R_1$<br>( $s^{-1}$ ) | $R_2$<br>( $s^{-1}$ ) | NOE          | Model | $S^2$         | $S_f^2$       | $\tau_e < 100$ or $\tau_f$<br>(ps) | $\tau_e > 100$ or $\tau_s$<br>(ps) | $R_{ex}$<br>( $s^{-1}$ ) |
|---------|-----------------------|-----------------------|--------------|-------|---------------|---------------|------------------------------------|------------------------------------|--------------------------|
| A25     | 2.70 ± 0.03           | 7.75 ± 0.08           | 0.70 ± 0.01  | m2    | 0.817 ± 0.006 |               | 26 ± 7                             |                                    |                          |
| L26     | 2.74 ± 0.04           | 7.82 ± 0.10           | 0.68 ± 0.02  | m2    | 0.825 ± 0.008 |               | 40 ± 12                            |                                    |                          |
| D27     |                       |                       |              |       |               |               |                                    |                                    |                          |
| I28     | 2.68 ± 0.04           | 8.30 ± 0.11           | 0.71 ± 0.02  | m4    | 0.809 ± 0.013 |               | 21 ± 10                            |                                    | 0.67 ± 0.16              |
| A29     | 2.64 ± 0.04           | 8.14 ± 0.11           | 0.66 ± 0.02  | m4    | 0.788 ± 0.012 |               | 46 ± 10                            |                                    | 0.68 ± 0.15              |
| I30     | 2.71 ± 0.03           | 7.22 ± 0.08           | 0.66 ± 0.01  | m5    | 0.725 ± 0.019 | 0.833 ± 0.009 |                                    | 2396 ± 537                         |                          |
| K31     | 2.77 ± 0.05           | 8.79 ± 0.15           | 0.68 ± 0.03  | m4    | 0.830 ± 0.017 |               | 48 ± 19                            |                                    | 0.93 ± 0.21              |
| D32     | 2.74 ± 0.03           | 7.87 ± 0.09           | 0.69 ± 0.01  | m2    | 0.828 ± 0.007 |               | 38 ± 8                             |                                    |                          |
| S33     | 2.53 ± 0.03           | 6.73 ± 0.09           | 0.66 ± 0.02  | m5    | 0.673 ± 0.024 | 0.777 ± 0.021 |                                    | 2587 ± 844                         |                          |
| I34     | 2.87 ± 0.07           | 9.47 ± 0.19           | 0.66 ± 0.03  | m4    | 0.855 ± 0.020 |               | 69 ± 27                            |                                    | 1.37 ± 0.27              |
| E35     | 2.93 ± 0.04           | 8.12 ± 0.11           | 0.69 ± 0.02  | m2    | 0.869 ± 0.008 |               | 57 ± 17                            |                                    |                          |
| F36     | 2.82 ± 0.05           | 7.80 ± 0.13           | 0.69 ± 0.02  | m2    | 0.834 ± 0.010 |               | 43 ± 16                            |                                    |                          |
| F37     | 2.79 ± 0.04           | 7.38 ± 0.11           | 0.68 ± 0.02  | m5    | 0.732 ± 0.031 | 0.849 ± 0.012 |                                    | 3043 ± 1264                        |                          |
| V38     | 2.59 ± 0.04           | 9.34 ± 0.11           | 0.67 ± 0.02  | m4    | 0.775 ± 0.010 |               | 37 ± 8                             |                                    | 2.00 ± 0.14              |
| D39     | 2.73 ± 0.04           | 7.66 ± 0.10           | 0.68 ± 0.02  | m2    | 0.815 ± 0.007 |               | 38 ± 10                            |                                    |                          |
| G40     | 2.56 ± 0.05           | 6.95 ± 0.12           | 0.68 ± 0.02  | m5    | 0.709 ± 0.029 | 0.787 ± 0.049 |                                    | 2261 ± 1195                        |                          |
| D41     | 2.52 ± 0.03           | 6.31 ± 0.08           | 0.64 ± 0.01  | m5    | 0.590 ± 0.024 | 0.766 ± 0.009 |                                    | 3216 ± 546                         |                          |
| K42     | 2.66 ± 0.04           | 7.86 ± 0.10           | 0.64 ± 0.02  | m4    | 0.787 ± 0.012 |               | 58 ± 9                             |                                    | 0.39 ± 0.16              |
| I43     | 2.78 ± 0.04           | 8.69 ± 0.12           | 0.66 ± 0.02  | m4    | 0.827 ± 0.013 |               | 60 ± 14                            |                                    | 0.85 ± 0.17              |
| I44     | 2.84 ± 0.04           | 9.09 ± 0.13           | 0.69 ± 0.02  | m4    | 0.852 ± 0.014 |               | 47 ± 18                            |                                    | 1.04 ± 0.18              |
| L45     | 2.86 ± 0.05           | 7.77 ± 0.13           | 0.71 ± 0.03  | m5    | 0.787 ± 0.033 | 0.865 ± 0.027 |                                    | 3938 ± 2066                        |                          |
| K46     |                       |                       |              |       |               |               |                                    |                                    |                          |
| K47     | 2.75 ± 0.04           | 7.21 ± 0.10           | 0.61 ± 0.02  | m5    | 0.715 ± 0.023 | 0.860 ± 0.011 |                                    | 1922 ± 402                         |                          |
| Y48     | 2.86 ± 0.04           | 7.37 ± 0.10           | 0.65 ± 0.02  | m5    | 0.711 ± 0.026 | 0.871 ± 0.010 |                                    | 3031 ± 716                         |                          |
| K49     |                       |                       |              |       |               |               |                                    |                                    |                          |
| P50     |                       |                       |              |       |               |               |                                    |                                    |                          |
| H51     |                       |                       |              |       |               |               |                                    |                                    |                          |
| G52     | 1.40 ± 0.04           | 2.59 ± 0.11           | -0.77 ± 0.02 | m5    | 0.185 ± 0.022 | 0.607 ± 0.020 |                                    | 732 ± 108                          |                          |
| V53     | 1.16 ± 0.02           | 1.55 ± 0.05           | -1.38 ± 0.01 | m5    | 0.051 ± 0.010 | 0.558 ± 0.007 |                                    | 808 ± 33                           |                          |
| C54     | 0.83 ± 0.01           | 1.03 ± 0.04           | -1.79 ± 0.01 | m5    | 0.025 ± 0.008 | 0.434 ± 0.006 |                                    | 692 ± 35                           |                          |

## Supplementary Table 2 continued

Supplementary Table 2. AbrBN  $^{15}\text{N}$  relaxation and dynamics parameters (pH 5.8, 305.15 K, 399.8636182 MHz)

| Residue          | $R_1$<br>( $s^{-1}$ ) | $R_2$<br>( $s^{-1}$ ) | NOE         | Model     | $S^2$         | $S_f^2$       | $\tau_e < 100$ or $\tau_f$<br>(ps) | $\tau_e > 100$ or $\tau_s$<br>(ps) | $R_{ex}$<br>( $s^{-1}$ ) |
|------------------|-----------------------|-----------------------|-------------|-----------|---------------|---------------|------------------------------------|------------------------------------|--------------------------|
| <i>Monomer A</i> |                       |                       |             |           |               |               |                                    |                                    |                          |
| M1               |                       |                       |             |           |               |               |                                    |                                    |                          |
| K2               |                       |                       |             |           |               |               |                                    |                                    |                          |
| S3               | 2.17 ± 0.06           | 5.56 ± 0.18           | 0.29 ± 0.03 | <i>m2</i> | 0.582 ± 0.013 |               |                                    | 103 ± 9                            |                          |
| T4               | 2.35 ± 0.03           | 5.29 ± 0.12           | 0.42 ± 0.02 | <i>m5</i> | 0.442 ± 0.025 | 0.759 ± 0.010 |                                    | 2060 ± 177                         |                          |
| G5               | 2.50 ± 0.03           | 5.75 ± 0.11           | 0.50 ± 0.01 | <i>m5</i> | 0.484 ± 0.026 | 0.786 ± 0.009 |                                    | 2496 ± 227                         |                          |
| I6               | 2.69 ± 0.03           | 8.09 ± 0.12           | 0.72 ± 0.01 | <i>m2</i> | 0.829 ± 0.007 |               | 20 ± 8                             |                                    |                          |
| V7               | 2.67 ± 0.03           | 7.45 ± 0.12           | 0.66 ± 0.02 | <i>m2</i> | 0.793 ± 0.008 |               | 42 ± 10                            |                                    |                          |
| R8               | 2.77 ± 0.04           | 7.44 ± 0.13           | 0.67 ± 0.02 | <i>m2</i> | 0.812 ± 0.008 |               | 43 ± 11                            |                                    |                          |
| K9               | 2.56 ± 0.04           | 7.17 ± 0.15           | 0.61 ± 0.02 | <i>m2</i> | 0.755 ± 0.009 |               | 56 ± 11                            |                                    |                          |
| V10              | 2.60 ± 0.03           | 7.71 ± 0.13           | 0.69 ± 0.02 | <i>m2</i> | 0.793 ± 0.008 |               | 33 ± 9                             |                                    |                          |
| D11              |                       |                       |             |           |               |               |                                    |                                    |                          |
| E12              | 2.66 ± 0.03           | 7.11 ± 0.11           | 0.68 ± 0.01 | <i>m5</i> | 0.675 ± 0.031 | 0.811 ± 0.009 |                                    | 3694 ± 1049                        |                          |
| L13              | 2.81 ± 0.03           | 7.80 ± 0.12           | 0.72 ± 0.02 | <i>m2</i> | 0.841 ± 0.008 |               | 23 ± 11                            |                                    |                          |
| G14              | 2.73 ± 0.04           | 7.99 ± 0.12           | 0.69 ± 0.02 | <i>m4</i> | 0.811 ± 0.011 |               | 30 ± 9                             |                                    | 0.46 ± 0.17              |
| R15              | 2.84 ± 0.04           | 7.88 ± 0.13           | 0.70 ± 0.02 | <i>m2</i> | 0.848 ± 0.008 |               | 32 ± 12                            |                                    |                          |
| V16              | 2.73 ± 0.04           | 8.95 ± 0.17           | 0.77 ± 0.02 | <i>m3</i> | 0.836 ± 0.012 |               |                                    |                                    | 0.98 ± 0.21              |
| V17              | 2.61 ± 0.03           | 8.35 ± 0.14           | 0.67 ± 0.02 | <i>m4</i> | 0.797 ± 0.010 |               | 41 ± 10                            |                                    | 0.57 ± 0.17              |
| I18              |                       |                       |             |           |               |               |                                    |                                    |                          |
| P19              |                       |                       |             |           |               |               |                                    |                                    |                          |
| I20              | 2.69 ± 0.05           | 7.95 ± 0.18           | 0.71 ± 0.02 | <i>m2</i> | 0.823 ± 0.011 |               | 28 ± 14                            |                                    |                          |
| E21              | 2.78 ± 0.04           | 7.94 ± 0.13           | 0.68 ± 0.02 | <i>m5</i> | 0.787 ± 0.027 | 0.872 ± 0.021 |                                    | 2044 ± 892                         |                          |
| L22              | 2.77 ± 0.03           | 7.70 ± 0.13           | 0.68 ± 0.02 | <i>m2</i> | 0.824 ± 0.009 |               | 48 ± 13                            |                                    |                          |
| R23              | 2.66 ± 0.04           | 7.72 ± 0.14           | 0.66 ± 0.02 | <i>m2</i> | 0.802 ± 0.009 |               | 48 ± 10                            |                                    |                          |
| R24              | 2.69 ± 0.03           | 8.08 ± 0.13           | 0.69 ± 0.01 | <i>m2</i> | 0.826 ± 0.007 |               | 39 ± 9                             |                                    |                          |
| T25              | 2.59 ± 0.03           | 7.60 ± 0.11           | 0.68 ± 0.01 | <i>m2</i> | 0.787 ± 0.007 |               | 33 ± 7                             |                                    |                          |
| L26              | 2.72 ± 0.03           | 7.76 ± 0.13           | 0.69 ± 0.02 | <i>m2</i> | 0.819 ± 0.009 |               | 40 ± 12                            |                                    |                          |
| G27              | 2.66 ± 0.03           | 7.58 ± 0.12           | 0.70 ± 0.02 | <i>m2</i> | 0.801 ± 0.008 |               | 28 ± 9                             |                                    |                          |
| I28              | 2.58 ± 0.03           | 7.87 ± 0.13           | 0.68 ± 0.02 | <i>m4</i> | 0.782 ± 0.010 |               | 31 ± 8                             |                                    | 0.37 ± 0.15              |
| A29              | 2.60 ± 0.03           | 7.20 ± 0.12           | 0.65 ± 0.02 | <i>m2</i> | 0.768 ± 0.008 |               | 46 ± 7                             |                                    |                          |
| E30              | 2.59 ± 0.03           | 6.61 ± 0.10           | 0.59 ± 0.01 | <i>m5</i> | 0.606 ± 0.021 | 0.810 ± 0.007 |                                    | 2482 ± 278                         |                          |
| K31              | 2.61 ± 0.04           | 7.11 ± 0.14           | 0.57 ± 0.02 | <i>m2</i> | 0.756 ± 0.009 |               | 79 ± 11                            |                                    |                          |
| D32              | 2.72 ± 0.03           | 7.53 ± 0.10           | 0.66 ± 0.01 | <i>m5</i> | 0.762 ± 0.020 | 0.848 ± 0.018 |                                    | 1809 ± 531                         |                          |
| A33              | 2.36 ± 0.02           | 6.88 ± 0.10           | 0.55 ± 0.01 | <i>m4</i> | 0.688 ± 0.007 |               | 62 ± 4                             |                                    | 0.25 ± 0.12              |
| L34              | 2.62 ± 0.03           | 7.28 ± 0.14           | 0.67 ± 0.02 | <i>m2</i> | 0.778 ± 0.008 |               | 37 ± 9                             |                                    |                          |
| E35              | 2.79 ± 0.04           | 7.80 ± 0.14           | 0.68 ± 0.02 | <i>m2</i> | 0.832 ± 0.009 |               | 43 ± 14                            |                                    |                          |
| I36              | 2.81 ± 0.04           | 8.11 ± 0.17           | 0.71 ± 0.03 | <i>m1</i> | 0.856 ± 0.010 |               |                                    |                                    |                          |
| Y37              | 2.89 ± 0.06           | 12.00 ± 0.29          | 0.70 ± 0.04 | <i>m3</i> | 0.873 ± 0.018 |               |                                    |                                    | 3.88 ± 0.33              |
| V38              | 2.68 ± 0.04           | 8.04 ± 0.14           | 0.71 ± 0.02 | <i>m4</i> | 0.812 ± 0.011 |               | 21 ± 12                            |                                    | 0.36 ± 0.17              |
| D39              | 2.75 ± 0.03           | 7.83 ± 0.13           | 0.68 ± 0.02 | <i>m2</i> | 0.825 ± 0.008 |               | 39 ± 11                            |                                    |                          |

Supplementary Table 2 continued

Supplementary Table 2. AbrBN <sup>15</sup>N relaxation and dynamics parameters (pH 5.8, 305.15 K, 399.8636182 MHz)

| Residue          | $R_1$<br>( $s^{-1}$ ) | $R_2$<br>( $s^{-1}$ ) | NOE          | Model     | $S^2$         | $S_f^2$       | $\tau_e < 100$ or $\tau_f$<br>(ps) | $\tau_e > 100$ or $\tau_s$<br>(ps) | $R_{ex}$<br>( $s^{-1}$ ) |
|------------------|-----------------------|-----------------------|--------------|-----------|---------------|---------------|------------------------------------|------------------------------------|--------------------------|
| D40              | 2.51 ± 0.05           | 8.41 ± 0.18           | 0.68 ± 0.02  | <i>m4</i> | 0.758 ± 0.015 |               | 31 ± 9                             |                                    | 1.13 ± 0.23              |
| E41              | 2.55 ± 0.05           | 17.06 ± 0.40          | 0.61 ± 0.03  | <i>m4</i> | 0.744 ± 0.016 |               | 55 ± 12                            |                                    | 10.10 ± 0.40             |
| K42              | 2.67 ± 0.04           | 8.11 ± 0.16           | 0.62 ± 0.03  | <i>m4</i> | 0.785 ± 0.013 |               | 67 ± 15                            |                                    | 0.70 ± 0.20              |
| I43              | 2.75 ± 0.04           | 8.04 ± 0.15           | 0.68 ± 0.02  | <i>m2</i> | 0.833 ± 0.010 |               | 41 ± 15                            |                                    |                          |
| I44              | 2.81 ± 0.04           | 7.91 ± 0.15           | 0.70 ± 0.02  | <i>m2</i> | 0.843 ± 0.010 |               | 34 ± 17                            |                                    |                          |
| L45              | 2.77 ± 0.04           | 8.29 ± 0.16           | 0.70 ± 0.02  | <i>m4</i> | 0.835 ± 0.013 |               | 31 ± 17                            |                                    | 0.40 ± 0.20              |
| K46              | 2.74 ± 0.05           | 7.93 ± 0.17           | 0.66 ± 0.03  | <i>m2</i> | 0.826 ± 0.012 |               | 51 ± 20                            |                                    |                          |
| K47              | 2.65 ± 0.04           | 7.37 ± 0.14           | 0.67 ± 0.02  | <i>m2</i> | 0.787 ± 0.010 |               | 40 ± 12                            |                                    |                          |
| Y48              | 2.72 ± 0.03           | 7.51 ± 0.12           | 0.65 ± 0.02  | <i>m2</i> | 0.803 ± 0.008 |               | 55 ± 10                            |                                    |                          |
| K49              | 2.36 ± 0.03           | 5.84 ± 0.12           | 0.38 ± 0.02  | <i>m5</i> | 0.576 ± 0.025 | 0.781 ± 0.023 |                                    | 1066 ± 246                         |                          |
| P50              |                       |                       |              |           |               |               |                                    |                                    |                          |
| N51              | 1.75 ± 0.03           | 3.62 ± 0.10           | -0.25 ± 0.02 | <i>m5</i> | 0.286 ± 0.019 | 0.677 ± 0.010 |                                    | 947 ± 82                           |                          |
| M52              | 1.30 ± 0.02           | 2.14 ± 0.08           | -2.18 ± 0.05 | <i>m2</i> | 0.123 ± 0.005 |               |                                    | 225 ± 7                            |                          |
| T53              | 0.79 ± 0.01           | 0.99 ± 0.07           | -2.31 ± 0.01 | <i>m5</i> | 0.027 ± 0.012 | 0.466 ± 0.015 |                                    | 493 ± 61                           |                          |
| <i>Monomer B</i> |                       |                       |              |           |               |               |                                    |                                    |                          |
| M1               |                       |                       |              |           |               |               |                                    |                                    |                          |
| K2               |                       |                       |              |           |               |               |                                    |                                    |                          |
| S3               | 2.17 ± 0.06           | 5.56 ± 0.18           | 0.29 ± 0.03  | <i>m2</i> | 0.582 ± 0.014 |               |                                    | 102 ± 9                            |                          |
| T4               | 2.35 ± 0.03           | 5.29 ± 0.12           | 0.42 ± 0.02  | <i>m5</i> | 0.440 ± 0.025 | 0.759 ± 0.011 |                                    | 2068 ± 175                         |                          |
| G5               | 2.50 ± 0.03           | 5.75 ± 0.11           | 0.50 ± 0.01  | <i>m5</i> | 0.479 ± 0.026 | 0.786 ± 0.009 |                                    | 2528 ± 222                         |                          |
| I6               | 2.69 ± 0.03           | 8.09 ± 0.12           | 0.72 ± 0.01  | <i>m2</i> | 0.828 ± 0.007 |               | 20 ± 8                             |                                    |                          |
| V7               | 2.67 ± 0.03           | 7.45 ± 0.12           | 0.66 ± 0.02  | <i>m2</i> | 0.793 ± 0.008 |               | 45 ± 9                             |                                    |                          |
| R8               | 2.77 ± 0.04           | 7.44 ± 0.13           | 0.67 ± 0.02  | <i>m2</i> | 0.812 ± 0.009 |               | 43 ± 11                            |                                    |                          |
| K9               | 2.56 ± 0.04           | 7.17 ± 0.15           | 0.61 ± 0.02  | <i>m2</i> | 0.755 ± 0.010 |               | 57 ± 11                            |                                    |                          |
| V10              | 2.60 ± 0.03           | 7.71 ± 0.13           | 0.69 ± 0.02  | <i>m2</i> | 0.793 ± 0.008 |               | 33 ± 9                             |                                    |                          |
| D11              |                       |                       |              |           |               |               |                                    |                                    |                          |
| E12              | 2.66 ± 0.03           | 7.11 ± 0.11           | 0.68 ± 0.01  | <i>m5</i> | 0.715 ± 0.026 | 0.811 ± 0.018 |                                    | 2835 ± 945                         |                          |
| L13              | 2.81 ± 0.03           | 7.80 ± 0.12           | 0.72 ± 0.02  | <i>m5</i> | 0.783 ± 0.029 | 0.856 ± 0.018 |                                    | 4082 ± 1778                        |                          |
| G14              | 2.73 ± 0.04           | 7.99 ± 0.12           | 0.69 ± 0.02  | <i>m4</i> | 0.811 ± 0.011 |               | 30 ± 10                            |                                    | 0.46 ± 0.15              |
| R15              | 2.84 ± 0.04           | 7.88 ± 0.13           | 0.70 ± 0.02  | <i>m2</i> | 0.848 ± 0.009 |               | 32 ± 12                            |                                    |                          |
| V16              | 2.73 ± 0.04           | 8.95 ± 0.17           | 0.77 ± 0.02  | <i>m3</i> | 0.832 ± 0.012 |               |                                    |                                    | 1.09 ± 0.20              |
| V17              | 2.61 ± 0.03           | 8.35 ± 0.14           | 0.67 ± 0.02  | <i>m4</i> | 0.796 ± 0.010 |               | 41 ± 9                             |                                    | 0.58 ± 0.18              |
| I18              |                       |                       |              |           |               |               |                                    |                                    |                          |
| P19              |                       |                       |              |           |               |               |                                    |                                    |                          |
| I20              | 2.69 ± 0.05           | 7.95 ± 0.18           | 0.71 ± 0.02  | <i>m2</i> | 0.824 ± 0.013 |               | 27 ± 14                            |                                    |                          |
| E21              | 2.78 ± 0.04           | 7.94 ± 0.13           | 0.68 ± 0.02  | <i>m5</i> | 0.790 ± 0.025 | 0.872 ± 0.021 |                                    | 1985 ± 892                         |                          |
| L22              | 2.77 ± 0.03           | 7.70 ± 0.13           | 0.68 ± 0.02  | <i>m2</i> | 0.824 ± 0.009 |               | 46 ± 12                            |                                    |                          |
| R23              | 2.66 ± 0.04           | 7.72 ± 0.14           | 0.66 ± 0.02  | <i>m2</i> | 0.802 ± 0.009 |               | 47 ± 11                            |                                    |                          |
| R24              | 2.69 ± 0.03           | 8.08 ± 0.13           | 0.69 ± 0.01  | <i>m2</i> | 0.825 ± 0.008 |               | 39 ± 10                            |                                    |                          |
| T25              | 2.59 ± 0.03           | 7.60 ± 0.11           | 0.68 ± 0.01  | <i>m2</i> | 0.787 ± 0.007 |               | 34 ± 7                             |                                    |                          |

Supplementary Table 2 continued

Supplementary Table 2. AbrBN  $^{15}\text{N}$  relaxation and dynamics parameters (pH 5.8, 305.15 K, 399.8636182 MHz)

| Residue | $R_1$<br>( $s^{-1}$ ) | $R_2$<br>( $s^{-1}$ ) | NOE          | Model | $S^2$         | $S_f^2$       | $\tau_e < 100$ or $\tau_f$<br>(ps) | $\tau_e > 100$ or $\tau_s$<br>(ps) | $R_{ex}$<br>( $s^{-1}$ ) |
|---------|-----------------------|-----------------------|--------------|-------|---------------|---------------|------------------------------------|------------------------------------|--------------------------|
| L26     | 2.72 ± 0.03           | 7.76 ± 0.13           | 0.69 ± 0.02  | m2    | 0.819 ± 0.009 |               | 39 ± 11                            |                                    |                          |
| G27     | 2.66 ± 0.03           | 7.58 ± 0.12           | 0.70 ± 0.02  | m2    | 0.801 ± 0.008 |               | 28 ± 8                             |                                    |                          |
| I28     | 2.58 ± 0.03           | 7.87 ± 0.13           | 0.68 ± 0.02  | m4    | 0.785 ± 0.010 |               | 32 ± 8                             |                                    | 0.29 ± 0.15              |
| A29     | 2.60 ± 0.03           | 7.20 ± 0.12           | 0.65 ± 0.02  | m2    | 0.768 ± 0.008 |               | 46 ± 7                             |                                    |                          |
| E30     | 2.59 ± 0.03           | 6.61 ± 0.10           | 0.59 ± 0.01  | m5    | 0.604 ± 0.021 | 0.810 ± 0.007 |                                    | 2500 ± 253                         |                          |
| K31     | 2.61 ± 0.04           | 7.11 ± 0.14           | 0.57 ± 0.02  | m2    | 0.756 ± 0.010 |               | 79 ± 12                            |                                    |                          |
| D32     | 2.72 ± 0.03           | 7.53 ± 0.10           | 0.66 ± 0.01  | m5    | 0.769 ± 0.021 | 0.847 ± 0.033 |                                    | 1635 ± 608                         |                          |
| A33     | 2.36 ± 0.02           | 6.88 ± 0.10           | 0.55 ± 0.01  | m4    | 0.687 ± 0.007 |               | 61 ± 4                             |                                    | 0.28 ± 0.12              |
| L34     | 2.62 ± 0.03           | 7.28 ± 0.14           | 0.67 ± 0.02  | m2    | 0.778 ± 0.008 |               | 36 ± 9                             |                                    |                          |
| E35     | 2.79 ± 0.04           | 7.80 ± 0.14           | 0.68 ± 0.02  | m2    | 0.832 ± 0.009 |               | 43 ± 14                            |                                    |                          |
| I36     | 2.81 ± 0.04           | 8.11 ± 0.17           | 0.71 ± 0.03  | m1    | 0.856 ± 0.011 |               |                                    |                                    |                          |
| Y37     | 2.89 ± 0.06           | 12.00 ± 0.29          | 0.70 ± 0.04  | m3    | 0.873 ± 0.018 |               |                                    |                                    | 3.88 ± 0.35              |
| V38     | 2.68 ± 0.04           | 8.04 ± 0.14           | 0.71 ± 0.02  | m4    | 0.810 ± 0.012 |               | 20 ± 11                            |                                    | 0.41 ± 0.17              |
| D39     | 2.75 ± 0.03           | 7.83 ± 0.13           | 0.68 ± 0.02  | m2    | 0.825 ± 0.009 |               | 38 ± 11                            |                                    |                          |
| D40     | 2.51 ± 0.05           | 8.41 ± 0.18           | 0.68 ± 0.02  | m4    | 0.756 ± 0.015 |               | 31 ± 9                             |                                    | 1.18 ± 0.21              |
| E41     | 2.55 ± 0.05           | 17.06 ± 0.40          | 0.61 ± 0.03  | m4    | 0.744 ± 0.015 |               | 55 ± 11                            |                                    | 10.11 ± 0.44             |
| K42     | 2.67 ± 0.04           | 8.11 ± 0.16           | 0.62 ± 0.03  | m4    | 0.783 ± 0.013 |               | 67 ± 15                            |                                    | 0.73 ± 0.19              |
| I43     | 2.75 ± 0.04           | 8.04 ± 0.15           | 0.68 ± 0.02  | m4    | 0.823 ± 0.011 |               | 40 ± 14                            |                                    | 0.28 ± 0.17              |
| I44     | 2.81 ± 0.04           | 7.91 ± 0.15           | 0.70 ± 0.02  | m2    | 0.843 ± 0.011 |               | 34 ± 17                            |                                    |                          |
| L45     | 2.77 ± 0.04           | 8.29 ± 0.16           | 0.70 ± 0.02  | m4    | 0.835 ± 0.014 |               | 31 ± 16                            |                                    | 0.40 ± 0.19              |
| K46     | 2.74 ± 0.05           | 7.93 ± 0.17           | 0.66 ± 0.03  | m4    | 0.812 ± 0.014 |               | 50 ± 19                            |                                    | 0.34 ± 0.22              |
| K47     | 2.65 ± 0.04           | 7.37 ± 0.14           | 0.67 ± 0.02  | m2    | 0.787 ± 0.009 |               | 40 ± 11                            |                                    |                          |
| Y48     | 2.72 ± 0.03           | 7.51 ± 0.12           | 0.65 ± 0.02  | m2    | 0.803 ± 0.008 |               | 55 ± 9                             |                                    |                          |
| K49     | 2.36 ± 0.03           | 5.84 ± 0.12           | 0.38 ± 0.02  | m5    | 0.574 ± 0.025 | 0.782 ± 0.015 |                                    | 1083 ± 236                         |                          |
| P50     |                       |                       |              |       |               |               |                                    |                                    |                          |
| N51     | 1.75 ± 0.03           | 3.62 ± 0.10           | -0.25 ± 0.02 | m5    | 0.283 ± 0.019 | 0.677 ± 0.010 |                                    | 962 ± 82                           |                          |
| M52     | 1.30 ± 0.02           | 2.14 ± 0.08           | -2.18 ± 0.05 | m2    | 0.123 ± 0.005 |               |                                    | 226 ± 7                            |                          |
| T53     | 0.79 ± 0.01           | 0.99 ± 0.07           | -2.31 ± 0.01 | m5    | 0.027 ± 0.011 | 0.466 ± 0.013 |                                    | 495 ± 56                           |                          |



Supplementary Table 3. SpoVTN <sup>15</sup>N relaxation and dynamics parameters (pH 5.8, 305.15 K, 399.8636182 MHz)

| Residue          | $R_1$<br>( $s^{-1}$ ) | $R_2$<br>( $s^{-1}$ ) | NOE          | Model     | $S^2$         | $S_f^2$       | $\tau_e < 100$ or $\tau_f$<br>(ps) | $\tau_e > 100$ or $\tau_s$<br>(ps) | $R_{ex}$<br>( $s^{-1}$ ) |
|------------------|-----------------------|-----------------------|--------------|-----------|---------------|---------------|------------------------------------|------------------------------------|--------------------------|
| <i>Monomer A</i> |                       |                       |              |           |               |               |                                    |                                    |                          |
| M1               |                       |                       |              |           |               |               |                                    |                                    |                          |
| K2               |                       |                       |              |           |               |               |                                    |                                    |                          |
| A3               | 1.88 ± 0.06           | 3.92 ± 0.14           | -0.27 ± 0.03 | <i>m5</i> | 0.288 ± 0.027 | 0.739 ± 0.021 |                                    | 1015 ± 110                         |                          |
| T4               | 1.93 ± 0.07           | 4.46 ± 0.16           | 0.04 ± 0.04  | <i>m5</i> | 0.365 ± 0.031 | 0.707 ± 0.021 |                                    | 1125 ± 181                         |                          |
| G5               | 2.22 ± 0.07           | 5.37 ± 0.17           | 0.28 ± 0.04  | <i>m5</i> | 0.443 ± 0.033 | 0.768 ± 0.023 |                                    | 1501 ± 222                         |                          |
| I6               | 2.43 ± 0.09           | 7.36 ± 0.23           | 0.64 ± 0.05  | <i>m2</i> | 0.733 ± 0.019 |               | 45 ± 19                            |                                    |                          |
| V7               | 2.56 ± 0.09           | 7.70 ± 0.24           | 0.73 ± 0.06  | <i>m1</i> | 0.788 ± 0.019 |               |                                    |                                    |                          |
| R8               | 2.69 ± 0.11           | 8.04 ± 0.30           | 0.67 ± 0.06  | <i>m1</i> | 0.827 ± 0.022 |               |                                    |                                    |                          |
| R9               | 2.44 ± 0.08           | 7.48 ± 0.24           | 0.66 ± 0.05  | <i>m2</i> | 0.751 ± 0.020 |               | 38 ± 19                            |                                    |                          |
| I10              | 2.63 ± 0.09           | 8.64 ± 0.25           | 0.70 ± 0.05  | <i>m1</i> | 0.853 ± 0.020 |               |                                    |                                    |                          |
| D11              | 2.59 ± 0.09           | 9.11 ± 0.25           | 0.70 ± 0.05  | <i>m3</i> | 0.827 ± 0.030 |               |                                    |                                    | 0.76 ± 0.38              |
| D12              | 2.54 ± 0.08           | 7.12 ± 0.19           | 0.64 ± 0.04  | <i>m5</i> | 0.648 ± 0.044 | 0.803 ± 0.027 |                                    | 2752 ± 1446                        |                          |
| L13              | 2.62 ± 0.09           | 7.98 ± 0.23           | 0.67 ± 0.04  | <i>m2</i> | 0.802 ± 0.019 |               | 46 ± 24                            |                                    |                          |
| G14              | 2.63 ± 0.09           | 8.68 ± 0.28           | 0.69 ± 0.05  | <i>m1</i> | 0.853 ± 0.020 |               |                                    |                                    |                          |
| R15              |                       |                       |              |           |               |               |                                    |                                    |                          |
| V16              | 2.47 ± 0.11           | 9.09 ± 0.34           | 0.68 ± 0.07  | <i>m3</i> | 0.792 ± 0.034 |               |                                    |                                    | 1.00 ± 0.49              |
| V17              | 2.45 ± 0.09           | 9.11 ± 0.28           | 0.66 ± 0.06  | <i>m4</i> | 0.786 ± 0.030 |               | 49 ± 28                            |                                    | 0.77 ± 0.42              |
| I18              | 2.45 ± 0.09           | 7.39 ± 0.23           | 0.53 ± 0.05  | <i>m2</i> | 0.732 ± 0.019 |               | 87 ± 21                            |                                    |                          |
| P19              |                       |                       |              |           |               |               |                                    |                                    |                          |
| K20              |                       |                       |              |           |               |               |                                    |                                    |                          |
| E21              | 2.60 ± 0.09           | 9.11 ± 0.28           | 0.76 ± 0.05  | <i>m1</i> | 0.863 ± 0.019 |               |                                    |                                    |                          |
| I22              | 2.71 ± 0.11           | 8.33 ± 0.27           | 0.69 ± 0.06  | <i>m1</i> | 0.843 ± 0.021 |               |                                    |                                    |                          |
| R23              |                       |                       |              |           |               |               |                                    |                                    |                          |
| R24              | 2.53 ± 0.08           | 8.79 ± 0.22           | 0.70 ± 0.04  | <i>m1</i> | 0.836 ± 0.015 |               |                                    |                                    |                          |
| T25              | 2.47 ± 0.08           | 8.30 ± 0.23           | 0.69 ± 0.04  | <i>m2</i> | 0.790 ± 0.018 |               | 38 ± 20                            |                                    |                          |
| L26              |                       |                       |              |           |               |               |                                    |                                    |                          |
| R27              | 2.72 ± 0.09           | 8.62 ± 0.26           | 0.71 ± 0.06  | <i>m1</i> | 0.859 ± 0.019 |               |                                    |                                    |                          |
| I28              | 2.55 ± 0.09           | 8.89 ± 0.29           | 0.68 ± 0.06  | <i>m1</i> | 0.843 ± 0.021 |               |                                    |                                    |                          |
| R29              | 2.56 ± 0.10           | 7.91 ± 0.25           | 0.66 ± 0.05  | <i>m2</i> | 0.793 ± 0.020 |               | 47 ± 27                            |                                    |                          |
| E30              | 2.54 ± 0.07           | 7.26 ± 0.18           | 0.70 ± 0.03  | <i>m5</i> | 0.631 ± 0.047 | 0.787 ± 0.017 |                                    | 5182 ± 1828                        |                          |
| G31              | 2.58 ± 0.11           | 9.05 ± 0.34           | 0.76 ± 0.07  | <i>m3</i> | 0.810 ± 0.035 |               |                                    |                                    | 1.05 ± 0.47              |
| D32              | 2.66 ± 0.08           | 8.84 ± 0.19           | 0.75 ± 0.04  | <i>m1</i> | 0.866 ± 0.014 |               |                                    |                                    |                          |
| P33              |                       |                       |              |           |               |               |                                    |                                    |                          |
| L34              | 2.54 ± 0.07           | 7.82 ± 0.17           | 0.62 ± 0.03  | <i>m2</i> | 0.781 ± 0.013 |               | 63 ± 15                            |                                    |                          |
| E35              | 2.67 ± 0.10           | 8.38 ± 0.29           | 0.65 ± 0.06  | <i>m2</i> | 0.831 ± 0.023 |               | 70 ± 43                            |                                    |                          |
| I36              | 2.73 ± 0.13           | 8.54 ± 0.38           | 0.70 ± 0.08  | <i>m1</i> | 0.860 ± 0.026 |               |                                    |                                    |                          |
| F37              | 2.73 ± 0.13           | 9.04 ± 0.41           | 0.70 ± 0.09  | <i>m1</i> | 0.885 ± 0.029 |               |                                    |                                    |                          |
| V38              |                       |                       |              |           |               |               |                                    |                                    |                          |
| D39              | 2.60 ± 0.10           | 8.30 ± 0.28           | 0.65 ± 0.06  | <i>m2</i> | 0.818 ± 0.021 |               | 60 ± 39                            |                                    |                          |



## Supplementary Table 2 continued

Supplementary Table 3. SpoVTN  $^{15}\text{N}$  relaxation and dynamics parameters (pH 5.8, 305.15 K, 399.8636182 MHz)

| Residue | $R_1$<br>( $s^{-1}$ ) | $R_2$<br>( $s^{-1}$ ) | NOE          | Model | $S^2$         | $S_f^2$       | $\tau_e < 100$ or $\tau_f$<br>(ps) | $\tau_e > 100$ or $\tau_s$<br>(ps) | $R_{ex}$<br>( $s^{-1}$ ) |
|---------|-----------------------|-----------------------|--------------|-------|---------------|---------------|------------------------------------|------------------------------------|--------------------------|
| R24     | 2.53 ± 0.08           | 8.79 ± 0.22           | 0.70 ± 0.04  | m1    | 0.835 ± 0.016 |               |                                    |                                    |                          |
| T25     | 2.47 ± 0.08           | 8.30 ± 0.23           | 0.69 ± 0.04  | m2    | 0.790 ± 0.017 |               | 38 ± 20                            |                                    |                          |
| L26     |                       |                       |              |       |               |               |                                    |                                    |                          |
| R27     | 2.72 ± 0.09           | 8.62 ± 0.26           | 0.71 ± 0.06  | m1    | 0.858 ± 0.020 |               |                                    |                                    |                          |
| I28     | 2.55 ± 0.09           | 8.89 ± 0.29           | 0.68 ± 0.06  | m1    | 0.843 ± 0.019 |               |                                    |                                    |                          |
| R29     | 2.56 ± 0.10           | 7.91 ± 0.25           | 0.66 ± 0.05  | m2    | 0.792 ± 0.018 |               | 48 ± 28                            |                                    |                          |
| E30     | 2.54 ± 0.07           | 7.26 ± 0.18           | 0.70 ± 0.03  | m5    | 0.638 ± 0.043 | 0.787 ± 0.018 |                                    | 5054 ± 1884                        |                          |
| G31     | 2.58 ± 0.11           | 9.05 ± 0.34           | 0.76 ± 0.07  | m3    | 0.810 ± 0.033 |               |                                    |                                    | 1.04 ± 0.47              |
| D32     | 2.66 ± 0.08           | 8.84 ± 0.19           | 0.75 ± 0.04  | m1    | 0.865 ± 0.016 |               |                                    |                                    |                          |
| P33     |                       |                       |              |       |               |               |                                    |                                    |                          |
| L34     | 2.54 ± 0.07           | 7.82 ± 0.17           | 0.62 ± 0.03  | m2    | 0.781 ± 0.013 |               | 63 ± 14                            |                                    |                          |
| E35     | 2.67 ± 0.10           | 8.38 ± 0.29           | 0.65 ± 0.06  | m2    | 0.831 ± 0.022 |               | 70 ± 40                            |                                    |                          |
| I36     | 2.73 ± 0.13           | 8.54 ± 0.38           | 0.70 ± 0.08  | m1    | 0.860 ± 0.028 |               |                                    |                                    |                          |
| F37     | 2.73 ± 0.13           | 9.04 ± 0.41           | 0.70 ± 0.09  | m1    | 0.885 ± 0.028 |               |                                    |                                    |                          |
| V38     |                       |                       |              |       |               |               |                                    |                                    |                          |
| D39     | 2.60 ± 0.10           | 8.30 ± 0.28           | 0.65 ± 0.06  | m2    | 0.818 ± 0.022 |               | 60 ± 41                            |                                    |                          |
| R40     | 2.46 ± 0.12           | 7.01 ± 0.30           | 0.60 ± 0.06  | m2    | 0.720 ± 0.022 |               | 56 ± 23                            |                                    |                          |
| D41     | 2.39 ± 0.08           | 7.17 ± 0.21           | 0.59 ± 0.04  | m2    | 0.718 ± 0.015 |               | 58 ± 16                            |                                    |                          |
| G42     | 2.34 ± 0.08           | 7.14 ± 0.21           | 0.61 ± 0.05  | m2    | 0.714 ± 0.016 |               | 47 ± 15                            |                                    |                          |
| E43     | 2.56 ± 0.08           | 7.54 ± 0.21           | 0.63 ± 0.04  | m2    | 0.766 ± 0.017 |               | 60 ± 20                            |                                    |                          |
| V44     | 2.57 ± 0.10           | 8.54 ± 0.30           | 0.69 ± 0.06  | m1    | 0.837 ± 0.022 |               |                                    |                                    |                          |
| I45     |                       |                       |              |       |               |               |                                    |                                    |                          |
| L46     | 2.62 ± 0.11           | 9.00 ± 0.32           | 0.73 ± 0.07  | m3    | 0.824 ± 0.035 |               |                                    |                                    | 0.84 ± 0.45              |
| K47     | 2.62 ± 0.11           | 8.29 ± 0.29           | 0.69 ± 0.07  | m1    | 0.832 ± 0.022 |               |                                    |                                    |                          |
| K48     |                       |                       |              |       |               |               |                                    |                                    |                          |
| Y49     | 2.59 ± 0.10           | 7.94 ± 0.26           | 0.68 ± 0.06  | m2    | 0.792 ± 0.020 |               | 44 ± 30                            |                                    |                          |
| S50     | 2.24 ± 0.07           | 6.11 ± 0.16           | 0.40 ± 0.03  | m5    | 0.568 ± 0.029 | 0.763 ± 0.041 |                                    | 1097 ± 335                         |                          |
| P51     |                       |                       |              |       |               |               |                                    |                                    |                          |
| I52     | 1.75 ± 0.04           | 3.10 ± 0.11           | -0.39 ± 0.02 | m5    | 0.178 ± 0.019 | 0.697 ± 0.016 |                                    | 1187 ± 62                          |                          |
| S53     | 1.57 ± 0.05           | 2.56 ± 0.11           | -0.89 ± 0.03 | m5    | 0.131 ± 0.021 | 0.694 ± 0.021 |                                    | 906 ± 65                           |                          |
| E54     | 1.30 ± 0.04           | 1.80 ± 0.10           | -1.76 ± 0.05 | m5    | 0.065 ± 0.017 | 0.681 ± 0.018 |                                    | 630 ± 56                           |                          |
| L55     | 0.90 ± 0.03           | 1.12 ± 0.09           | -1.65 ± 0.02 | m5    | 0.023 ± 0.015 | 0.458 ± 0.016 |                                    | 755 ± 55                           |                          |

Table S4. Average DNA Base Pair and Base Pair step Parameters Prior and Post Docking

| Parameters <sup>a,b</sup>          | Prior – docking         | Post – docking <sup>c</sup> |
|------------------------------------|-------------------------|-----------------------------|
| Twist (35.9° <sub>0.9</sub> )      | 36.0° <sub>0.7</sub>    | 36.63° <sub>1.96</sub>      |
| Roll (-0.2° <sub>2.3</sub> )       | 1.7° <sub>0.2</sub>     | -0.06° <sub>3.85</sub>      |
| Tilt (0.0° <sub>0.1</sub> )        | -0.01° <sub>0.48</sub>  | -0.13° <sub>2.74</sub>      |
| Rise (3.4 Å <sub>0.0</sub> )       | 3.4 Å <sub>0.0</sub>    | 3.40 Å <sub>0.14</sub>      |
| Slide (0.3 Å <sub>0.2</sub> )      | 0.46 Å <sub>0.03</sub>  | 0.56 Å <sub>0.51</sub>      |
| Shift (0.0 Å <sub>0.1</sub> )      | 0.00 Å <sub>0.02</sub>  | -0.08 Å <sub>0.44</sub>     |
| Opening (-3.3 Å <sub>2.5</sub> )   | -1.68 Å <sub>0.28</sub> | 1.86 Å <sub>3.45</sub>      |
| Propeller (-10.2° <sub>7.3</sub> ) | -10.2° <sub>7.3</sub>   | 3.15° <sub>2.29</sub>       |
| Buckle (0.1° <sub>0.1</sub> )      | 0.05° <sub>0.56</sub>   | -0.23° <sub>2.62</sub>      |
| Stagger (0.1 Å <sub>0.0</sub> )    | 0.11 Å <sub>0.04</sub>  | -0.33 Å <sub>0.10</sub>     |
| Stretch (-0.1 Å <sub>0.0</sub> )   | -0.12 Å <sub>0.04</sub> | 0.05 Å <sub>0.08</sub>      |
| Shear (0.0 Å <sub>0.1</sub> )      | 0.0 Å <sub>0.1</sub>    | 0.04 Å <sub>0.26</sub>      |
| Minor groove width <sup>d</sup>    | 5.9 Å                   | 6.5 Å                       |
| Major groove width <sup>d</sup>    | 11.4 Å                  | 10.5 Å                      |

<sup>a</sup>The average values for the canonical B-DNA input structure are shown in the left column between brackets next to each parameter.

<sup>b</sup>Standard deviations are shown as subscripts.

<sup>c</sup>Values from the lowest HADDOCK score structure.

<sup>d</sup>Average values.

Table S5. Active and Passive Residues of AbrBN<sup>55</sup>-Tetramer and *abrB8*

|                     | Active <sup>a</sup>                                                                                  | Passive <sup>b</sup>                                                                                       |
|---------------------|------------------------------------------------------------------------------------------------------|------------------------------------------------------------------------------------------------------------|
| AbrBN <sup>55</sup> | R8, K9, R15, V17, I20, E21,<br>R23, R24, L26<br>T23, G24, A25, C26, A27,<br>T33, G34, G35, A36, A37, | M1, G5, I6, V7, E12, L13, G27,<br>A29, E30, K31, D32, Y48<br>T22, A28, T32, A38, G176, A182,<br>A185, C191 |
| <i>abrB8</i>        | T177, T178, T179, C180,<br>C181, A186, T187, T188,<br>G189, T190                                     |                                                                                                            |

<sup>a</sup>Active residues are described as residues with at least 40% solvent accessibility and known to be involved with binding.

<sup>b</sup>Passive residues are described as residues with at least 40% solvent accessibility and are adjacent to active residues, these residues are not directly involved in binding.

## SUPPLEMENTAL METHODS

### *Cloning of SpovTN*

DNA fragments coding the N-terminal domain SpovVT were obtained through PCR utilizing the Stratagene QuikChange Site-Directed Mutagenesis Kit (inserting a TAA stop codon at residue 56 from a construct containing the DNA sequence of full length SpovVT). DNA sequencing confirmed that the desired constructs were obtained. SpovVTN was obtained with the following oligonucleotide primers obtained from IDT-DNA:

SpoVTN Stop Forward:

5'- GCA TAC TCC TTT GCA AAG TCT **TAA** AGC TCA CTG ATC GGA GAG -3'

SpoVTN Stop Reverse:

5'- CTC TCC GAT CAG TGA GCT **TTA** AGA CTT TGC AAA GGA GTA TGC -3'

### *<sup>15</sup>N Backbone Relaxation Measurements and Model-free Analysis of Backbone Motions*

Buffers used for <sup>15</sup>N relaxation experiments were similar to those used for structure determination with one exception – TCEP (1 mM) was used instead of DTT in the AbhN NMR buffer.  $R_1$  and  $R_2$  measurements were collected with fully interleaved planes acquired at nine and eight relaxation delay values, respectively, with one exception. AbhN  $T_1$  time point measurements were collected individually. Relaxation delays were as follows: AbhN [ $T_1 = 10$  (x2), 50, 100, 160, 220 (x2), 300, 410, 560 (x2), 820 ms], [ $T_2 = 4$  (x2), 18, 34, 54, 76 (x2), 104, 140 (x2), 192 ms]; AbrBN [ $T_1 = 1.5$  (x2), 60, 120, 190, 280 (x2), 380, 520, 710 (x2), 1040 ms], [ $T_2 = 4$  (x2), 16, 32, 54, 80 (x2), 112, 160 (x2), 240 ms]; and SpoVTN [ $T_1 = 1.5$  (x2), 60, 120, 190, 280 (x2), 380, 520, 710 (x2), 1040 ms], [ $T_2 = 4$  (x2), 16, 32, 54, 80 (x2), 112, 160 (x2), 240 ms]. Three replicate  $\{^1\text{H}\}$ -<sup>15</sup>N NOE spectra were recorded with proton saturation using a 4 s period of saturation and interleaved with the reference spectrum, which was recorded with a 5 s recycle delay and no saturation. The instrument temperature was calibrated using 100% methanol before each set of experiments. Pulse sequences were written in-house from methods previously described (Farrow *et al.*, 1994; Skelton, 1993). Relaxation data were processed and analyzed using the NMRPipe/NMRDraw software suite using a Lorentz-to-Gauss window function (Delaglio *et al.*, 1995). Peak intensities were quantitated using the nlinLS module of the NMRPipe.  $R_1$  and  $R_2$  relaxation rates were obtained by fitting the peak intensities as a function of relaxation delay time to a single exponential decay function using the Levenberg-Marquardt nonlinear least-squares fitting program Curvefit v1.4 (A. G. Palmer III, Columbia University). Monte Carlo simulations were performed to estimate the uncertainty in the fitted parameters. Experimental errors associated with  $R_1$  and  $R_2$  relaxation rates were estimated from the baseline noise and the calculated uncertainty in peak intensities for duplicate data sets collected with the same relaxation delays. Steady-state  $\{^1\text{H}\}$ -<sup>15</sup>N NOE values were calculated as the ratio between cross-peak intensities with ( $I_{\text{ref}}$ ) and without ( $I_{\text{sat}}$ ) <sup>1</sup>H saturation ( $I_{\text{sat}}/I_{\text{ref}}$ ) averaged over three replicate experiments and errors were obtained by

$$\sigma_{\text{NOE}} = [((\sigma_{\text{sat}} * I_{\text{ref}})^2 + (\sigma_{\text{ref}} * I_{\text{sat}})^2)/(I_{\text{ref}})]^{1/2}$$

<sup>15</sup>N relaxation data for some residues were not obtained due to unobserved or overlapped resonances, as well as for all proline residues. For AbhN, these residues include M1, K2, V6, R15, P19, D27, K46, K49, P50 and H51. For AbrBN, these residues include M1, K2, D11, I18, P19 and P50. For SpoVTN, these residues include M1, K2, R15, P19, K20, R23, L26, P33, V38, I45, K48 and P51. The average 10% trimmed relaxation values are as follows: AbhN [ $R_1 = 2.70(\pm 0.10) \text{ s}^{-1}$ ,  $R_2 = 7.87(\pm 0.62) \text{ s}^{-1}$ ,  $\text{NOE} = 0.65(\pm 0.07)$ ]; AbrBN [ $R_1 = 2.65(\pm 0.10) \text{ s}^{-1}$ ,  $R_2 = 7.57(\pm 0.56) \text{ s}^{-1}$ ,  $\text{NOE} = 0.65(\pm 0.06)$ ]; and SpoVTN [ $R_1 = 2.49(\pm 0.18) \text{ s}^{-1}$ ,  $R_2 = 7.74(\pm 1.20) \text{ s}^{-1}$ ,  $\text{NOE} = 0.60(\pm 0.20)$ ].

The program PDBINTERTIA (A. G. Palmer III, Columbia University) was used to obtain inertia tensors and structure files rotated so the moments of inertia are aligned with the Cartesian axes and translated so that the center of mass is located at the origin. Diffusion tensor estimates for spherical, axially-symmetric and anisotropic motional models were determined using the programs R2R1\_TM and QUADRIC\_DIFFUSION (A. G. Palmer III, Columbia University), the latter of which was used to produce structures rotated into the diffusion frame for model-free analysis. Residue-specific 10% or 15% trimmed  $R_2/R_1$  ratios were used for the diffusion tensor estimate calculation, eliminating residues with very fast internal motions ( $\tau_c \ll \tau_m$ ; i.e., residues with low  $R_2/R_1$  ratios or NOE values  $< 0.6$ ) or significant  $R_{ex}$  contribution to  $R_2$  (i.e., residues with elevated  $R_2/R_1$  ratios) (Jarymowycz and Stone, 2006).  $\chi^2$  and  $F$  statistics reported by QUADRIC\_DIFFUSION were initially used to determine the appropriate diffusion tensor.

The initial global rotational correlation time ( $\tau_c$ ) estimates and  $D_{\parallel}/D_{\perp}$  values were set as follows: AbhN [isotropic:  $\tau_c=6.54$  ns; axial prolate:  $\tau_c=6.57$  ns;  $D_{\parallel}/D_{\perp}=1.18$ ], AbrBN<sup>53</sup> [isotropic:  $\tau_c=6.39$  ns; axial prolate:  $\tau_c=6.35$  ns;  $D_{\parallel}/D_{\perp}=1.11$ ], SpoVTN [isotropic:  $\tau_c=6.91$  ns; axial prolate:  $\tau_c=6.94$  ns;  $D_{\parallel}/D_{\perp}=1.22$ ]. The  $\tau_c$  values are consistent with the molecular size of a 10-12 kDa dimer in solution (Benson *et al.*, 2002; Bobay *et al.*, 2004; Bobay *et al.*, 2006; Dong *et al.*, 2004; Yao and Strauch, 2005). Values for the <sup>15</sup>N CSA and N-H bond length ( $r_{NH}$ ) were set to -172 ppm and 1.02Å, respectively, and Newton minimization was used for all calculations. The quality of the fits between the experimental data and each of the motional models and subsequent model selection was determined using previously described methods of model elimination (d'Auvergne and Gooley, 2006),  $\chi^2$  and Akaike's Information Criteria (AIC) statistics (d'Auvergne and Gooley, 2003) in the form of  $AIC=\chi^2+2k$ , where  $k$  is the number of model-free parameters in the model and  $\chi^2$  describes fit of the relaxation data to the model. A dimer symmetry-forced model selection protocol was used, where the number of datasets ( $n$ ),  $k$  and  $\chi^2$  for symmetry equivalent residues were summed before AIC model selection, resulting in the selection of identical models for symmetric residues between the individual monomers of the dimer structure. Parameter fitting errors were determined using 500 Monte Carlo simulations.

The  $S^2$  generalized order parameter is related to the equilibrium distribution of the N-H bond vector orientations; a value of 0 indicates completely unrestricted motion, whereas a value of 1 indicates completely restricted motion. The  $R_{ex}$  parameter describes the chemical exchange broadening contribution to the  $R_2$  rate constant on the  $\mu$ s-ms time scale. Other parameters and parametric restrictions resulting in the five mathematical motional models described above have been described previously (Clare *et al.*, 1990; Clare, 1990; Jarymowycz and Stone, 2006; Mandel *et al.*, 1995).

Several criteria were used to determine the diffusion tensor model and parameters most appropriate for fitting the relaxation data, including (1)  $F$  statistics describing the tensor estimations, as detailed above; (2)  $\chi^2$  and AIC statistics describing the fit of the relaxation data when assuming an isotropic or axial prolate tensor; and (3) the agreement between experimental and back-calculated <sup>15</sup>N relaxation parameters.

### **HADDOCK Docking Procedure**

The coordinate file for AbrBN<sup>55</sup>-tetramer was obtained by modeling the first 55 residues of AbrB against the solved structure of AbrBN by MODELLER (7v2) (Sali *et al.*, 1995). The resulting models were analyzed by their respective outputs from PROCHECK and their energy function output from MODELLER (Laskowski *et al.*, 1996; Sali *et al.*, 1995). The *abrB8* sequence 5'-ATG ATT GAC AAT TAT TGG AAA CCT -3' was used in this study (Xu *et al.*, 1996). A model of canonical C2'-endo conformation B-DNA was generated by 'DNA Tools'

(<http://hydra.icgeb.trieste.it/~kristian/dna/>) through a trinucleotide base pair parameter with AMBER minimization.

N-terminal domain mutations that disrupt AbrB binding to DNA are: R8S, K9R, G14A, R15H/S, V17A, I18G, P19A, I20L/S, E21A, L22R, R23S, R24S, L26R, I28G/R, L34H and C54S/Y/W (unpublished results). Of these R8, K9, R15, V17, I20, E21, L22, R23, R24 and L26 are defined as active. Residues G14, I18, P19, I28 and L34 are not solvent accessible. Residues M1, G5-V7, E12-L13, G27, A29, E30-D32 and Y48 are defined as passive. The promoter region of *abrB8* contains an asymmetric TGNNA-5bp-TGGNA binding motif, which has been shown to be a very loosely conserved sequence recognized by AbrB (Xu and Strauch, 1996). These base pairs (base pairs T6-A10, T16-T20, T4'-G8', and T14'-T18') were defined as the active region while two base pairs on either side of the TGNNA-5bp-TGGNA motif were defined as passive (base pairs T5, A11, T15, A21, C3', G9', A13', and T19') (Xu *et al.*, 1996).

Watson–Crick base pairs were defined and hydrogen bond lengths of the input structure were measured and restricted to  $\pm 0.05 \text{ \AA}$ . Sugar-phosphate backbone dihedral angles of the input structure were measured and used as restraints (restricted to  $\alpha = \alpha_{\text{inp}} \pm 10^\circ$ ,  $\beta = \beta_{\text{inp}} \pm 40^\circ$ ,  $\gamma = \gamma_{\text{inp}} \pm 20^\circ$ ,  $\delta = \delta_{\text{inp}} \pm 50^\circ$ ,  $\epsilon = \epsilon_{\text{inp}} \pm 10^\circ$  and  $\zeta = \zeta_{\text{inp}} \pm 50^\circ$ ), similar to other published protein:DNA interactions determined using HADDOCK (van Dijk *et al.*, 2006).

Planarity restraints for the purine and pyrimidine rings were introduced and the sugar pucker was restrained to the C2'-endo conformation to preserve DNA helical conformation. Consecutive phosphorus to phosphorus distances were measured and restricted to 6.0–7.5 Å. In order to preserve symmetry of the AbrBN<sup>55</sup>-tetramer, a non-crystallographic symmetry energy term (NCS) and distance symmetry potential were used to keep the C $\alpha$  atoms of the monomers superimposable. The H-bonding network of unbound AbrBN was employed as a restraint to maintain similar dimerization interfaces between the unbound and bound structures. Disulfide restraints in the AbrBN<sup>55</sup>-tetramer were restricted to 2.0 $\pm$ 0.25 nm. Systematic sampling of 180° rotated solutions was used in the rigid-body docking stage to minimize the occurrence of false positives.

## SUPPLEMENTAL REFERENCES

Benson, L.M., Vaughn, J.L., Strauch, M.A., Bobay, B.G., Thompson, R., Naylor, S., and Cavanagh, J. (2002). Macromolecular assembly of the transition state regulator AbrB in its unbound and complexed states probed by microelectrospray ionization mass spectrometry. *Anal Biochem* 306, 222-227.

Bobay, B.G., Benson, L., Naylor, S., Feeney, B., Clark, A.C., Goshe, M.B., Strauch, M.A., Thompson, R., and Cavanagh, J. (2004). Evaluation of the DNA binding tendencies of the transition state regulator AbrB. *Biochemistry* 43, 16106-16118.

Bobay, B.G., Mueller, G.A., Thompson, R.J., Murzin, A.G., Venters, R.A., Strauch, M.A., and Cavanagh, J. (2006). NMR structure of AbhN and comparison with AbrBN: FIRST insights into the DNA binding promiscuity and specificity of AbrB-like transition state regulator proteins. *J Biol Chem* 281, 21399-21409.

Clore, G. M., Driscoll, P. C., Wingfield, P. T., and Gronenborn, A. M. (1990). Analysis of the backbone dynamics of interleukin-1 beta using two-dimensional inverse detected heteronuclear 15N-1H NMR spectroscopy. *Biochemistry* 29, 7387-7401.

Clore, G. M., Szabo, A., Bax, A., Kay, L.E., Driscoll, P.C., and Gronenborn, A.M. (1990). Deviations from the Simple 2-Parameter Model-Free Approach to the Interpretation of N-15 Nuclear Magnetic-Relaxation of Proteins. *Journal of the American Chemical Society* 112, 4989-4991.

d'Auvergne, E. J., and Gooley, P. R. (2003). The use of model selection in the model-free analysis of protein dynamics. *J Biomol NMR* 25, 25-39.

d'Auvergne, E. J., and Gooley, P. R. (2006). Model-free model elimination: a new step in the model-free dynamic analysis of NMR relaxation data. *J Biomol NMR* 35, 117-135.

Delaglio, F., Grzesiek, S., Vuister, G. W., Zhu, G., Pfeifer, J., and Bax, A. (1995). NMRPipe: a multidimensional spectral processing system based on UNIX pipes. *J Biomol NMR* 6, 277-293.

Dong, T.C., Cutting, S.M., and Lewis, R.J. (2004). DNA-binding studies on the *Bacillus subtilis* transcriptional regulator and AbrB homologue, SpoVT. *FEMS Microbiol Lett* 233, 247-256.

Farrow, N. A., Muhandiram, R., Singer, A. U., Pascal, S. M., Kay, C. M., Gish, G., Shoelson, S. E., Pawson, T., Forman-Kay, J. D., and Kay, L. E. (1994). Backbone dynamics of a free and phosphopeptide-complexed Src homology 2 domain studied by <sup>15</sup>N NMR relaxation. *Biochemistry* 33, 5984-6003.

Jarymowycz, V. A., and Stone, M. J. (2006). Fast time scale dynamics of protein backbones: NMR relaxation methods, applications, and functional consequences. *Chem Rev* 106, 1624-1671.

Laskowski, R. A., Rullmann, J. A., MacArthur, M. W., Kaptein, R., and Thornton, J. M. (1996). AQUA and PROCHECK-NMR: programs for checking the quality of protein structures solved by NMR. *J Biomol NMR* 8, 477-486.

Mandel, A. M., Akke, M., and Palmer, A. G., 3rd (1995). Backbone dynamics of *Escherichia coli* ribonuclease HI: correlations with structure and function in an active enzyme. *J Mol Biol* 246, 144-163.

Sali, A., Potterton, L., Yuan, F., van Vlijmen, H., and Karplus, M. (1995). Evaluation of comparative protein modeling by MODELLER. *Proteins* 23, 318-326.

Skelton, N. J., Palmer III, A.G., Akke, M., Kordel, J., Rance, M., and Chazin, W.J. (1993). Practical Aspects of Two-Dimensional Proton-Detected <sup>15</sup>N spin Relaxation Measurements. *Journal of Magnetic Resonance* 102, 253-264.

van Dijk, M., van Dijk, A. D., Hsu, V., Boelens, R., and Bonvin, A. M. (2006). Information-driven protein-DNA docking using HADDOCK: it is a matter of flexibility. *Nucleic Acids Res* 34, 3317-3325.

Yao, F., and Strauch, M.A. (2005). Independent and interchangeable multimerization domains of the AbrB, Abh, and SpoVT global regulatory proteins. *J Bacteriol* 187, 6354-6362.

Xu, K., and Strauch, M. A. (1996). In vitro selection of optimal AbrB-binding sites: comparison to known in vivo sites indicates flexibility in AbrB binding and recognition of three-dimensional DNA structures. *Mol Microbiol* 19, 145-158.

Xu, K., Clark, D., and Strauch, M. A. (1996). Analysis of abrB mutations, mutant proteins, and why abrB does not utilize a perfect consensus in the -35 region of its sigma A promoter. *J Biol Chem* 271, 2621-2626.
